# Supplementary material for: Effect of CXCL17 on Subcutaneous Preadipocytes Proliferation in Goats
Source: MDPI journal article supplement (doi:10.3390/ani13111757), 2023-05-25
Supplement: s1 [file s1]

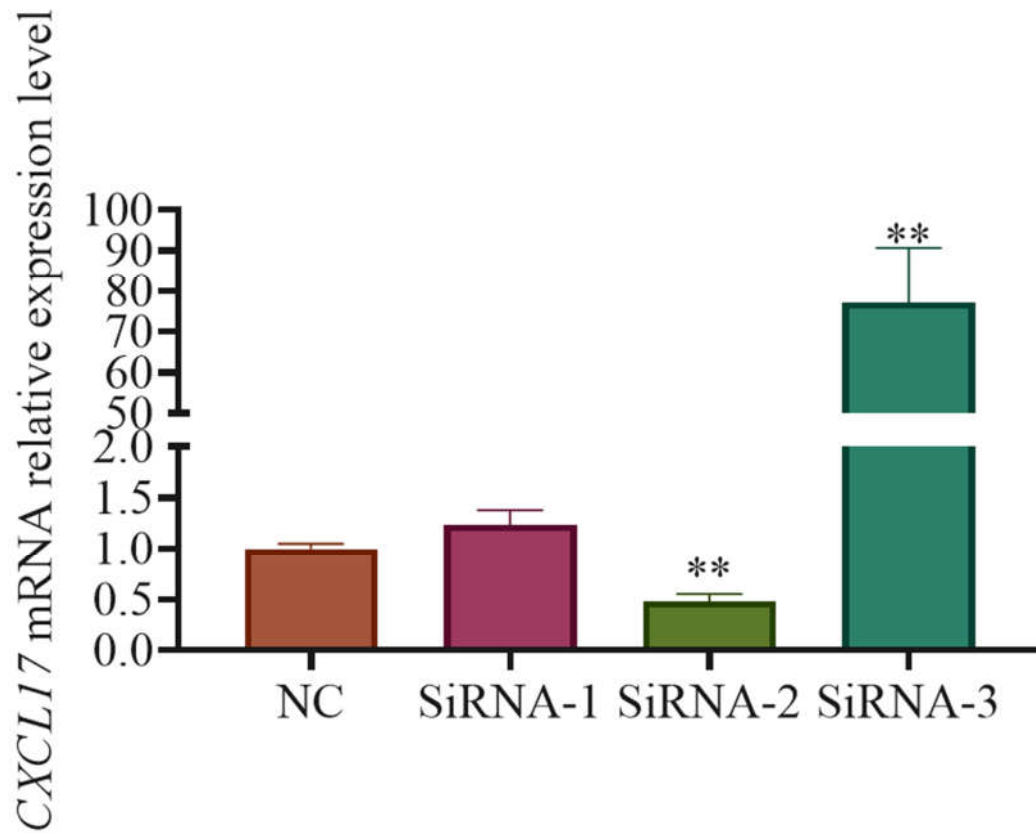

**Figure S1.** The knockdown efficiency detection of *CXCL17* at mRNA, SiRNA-1, SiRNA-2 and SiRNA-3 are synthesized by Shanghai GenePharma Co.,Ltd. (Shanghai, China), \*\*:  $p < 0.01$ .
